# Supplementary material for: Dissolution of K-silicate rocks with Acidithiobacillus thiooxidans biogenic acid: characterization and agronomic performance of the end-products
Source: Royal Society of Chemistry journal article supplement (doi:10.1039/d3nj05760g), 2024-01-01
Supplement: d3nj05760g1.pdf [file d3nj05760g1.pdf]

1  
2  
3  
4  
5  
6  
7  
8  
9  
10  
11  
12  
13  
14  
15  
16  
17  
18  
19  
20  
21  
22  
23  
24  
25  
26

**Supplementary Material for**

**Dissolution of potassium silicate rocks with *Acidithiobacillus thiooxidans* biogenic acid: characterization and agronomic performance of the end-products**

Patrícia Cardoso Matias<sup>a\*</sup>, Edson Marcio Mattiello<sup>a</sup>, Wedisson Oliveira Santos<sup>b</sup>, Denison Pogorzelski<sup>a</sup>, Fabiane Carvalho Ballotin<sup>a</sup>, Carolyne Henrique de Carvalho Espósito<sup>a</sup>, Jorge Luis Badel<sup>c</sup>

<sup>a</sup> Laboratory of Fertilizers, Department of Soil Science, Universidade Federal de Viçosa, Viçosa, Brazil.

<sup>b</sup> Laboratory of Soil and Plant Analysis, Institute of Agricultural Sciences, Universidade Federal de Uberlândia, Uberlândia, Brazil.

<sup>c</sup> Laboratory of Molecular Phytobacteriology, Department of Plant Pathology, Universidade Federal de Viçosa, Viçosa, Brazil

\* Corresponding author in the Department of Soil, Universidade Federal de Viçosa, Viçosa, Av. Peter Henry Rolfs, s/n – 36570-900 – Viçosa, MG – Brazil.

Email: matias.sjt@gmail.com (Patrícia Cardoso Matias)

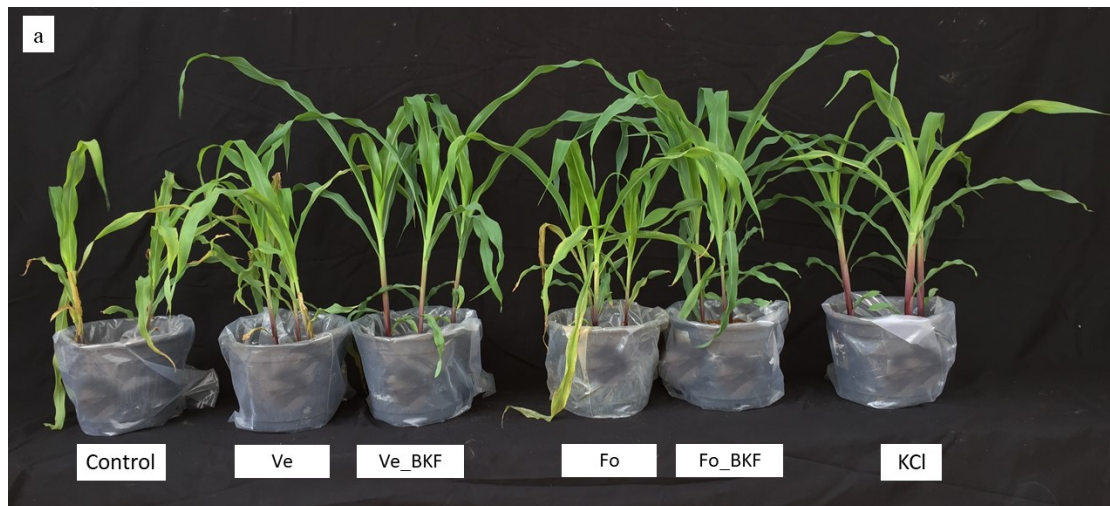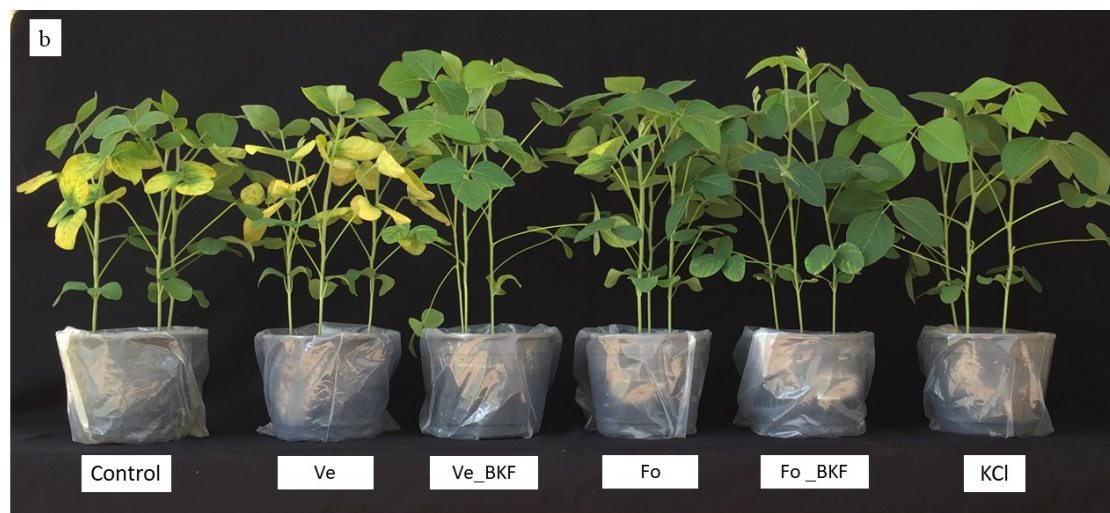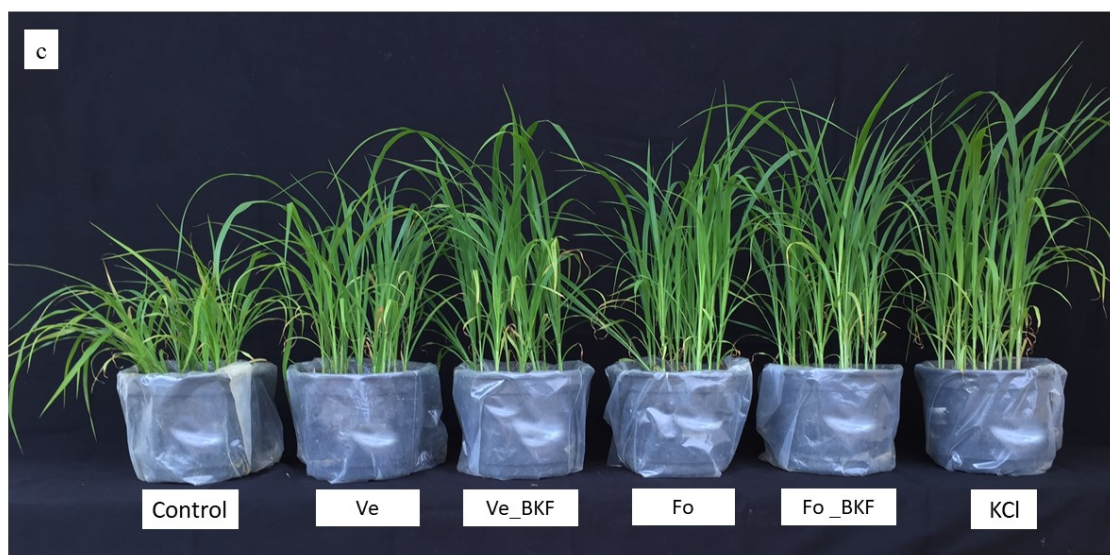

**Fig. A.1.** Response of corn (a), soybean (b) and millet (c) plants to application of verdete (Ve) and phonolite (Fo) rocks, and verdete (Ve-BKF) and phonolite (Fo-BKF) biogenic K-fertilizers and KCl at a dose of  $200 \text{ mg dm}^{-3} \text{ K}$ , compared to control plants without K application. Pictures were taken at 32, 40 and 30 days after sowing corn, soybean and millet, respectively.

**Table A.1.** Equations of recovered K contents by crop ( $\hat{y}$ , mg dm<sup>-3</sup>), according to the K doses ( $x$ , mg dm<sup>-3</sup>) of each fertilizer (KCl, verdete (Ve) and phonolite (Fo) rocks, and verdete (Ve-BKF) and phonolite (Fo-BKF) biogenic K-fertilizers, coefficient of determination ( $R^2$ ) and K recovery rate (Krr).

| Fertilizer     | Equation                   | $R^2$ | Krr  |
|----------------|----------------------------|-------|------|
| <b>CORN</b>    |                            |       |      |
| KCl            | $\hat{y} = 9.87 + 0.61 x$  | 0.99  | 0.61 |
| Fo-BKF         | $\hat{y} = 9.09 + 0.08 x$  | 0.98  | 0.08 |
| Ve-BKF         | $\hat{y} = 8.65 + 0.14 x$  | 0.99  | 0.14 |
| Fo             | $\hat{y} = \bar{y} = 9.79$ |       |      |
| Ve             | $\hat{y} = \bar{y} = 8.14$ |       |      |
| <b>SOYBEAN</b> |                            |       |      |
| KCl            | $\hat{y} = 3.87 + 0.14 x$  | 0.99  | 0.14 |
| Fo-BKF         | $\hat{y} = 3.87 + 0.01 x$  | 0.86  | 0.01 |
| Ve-BKF         | $\hat{y} = 3.99 + 0.01 x$  | 0.95  | 0.01 |
| Fo             | $\hat{y} = 4.50 + 0.01 x$  | 0.94  | 0.01 |
| Ve             | $\hat{y} = \bar{y} = 4.67$ |       |      |
| <b>MILLET</b>  |                            |       |      |
| KCl            | $\hat{y} = 8.92 + 0.08 x$  | 0.99  | 0.08 |
| Fo-BKF         | $\hat{y} = 9.25 + 0.01 x$  | 0.76  | 0.01 |
| Ve-BKF         | $\hat{y} = 9.17 + 0.03 x$  | 0.92  | 0.03 |
| Fo             | $\hat{y} = 9.55 + 0.02 x$  | 0.94  | 0.02 |
| Ve             | $\hat{y} = 9.93 + 0.01 x$  | 0.95  | 0.01 |
| <b>TOTAL</b>   |                            |       |      |
| KCl            | $\hat{y} = 22.67 + 0.74 x$ | 0.99  | 0.74 |
| Fo-BKF         | $\hat{y} = 22.21 + 0.10 x$ | 0.99  | 0.10 |
| Ve-BKF         | $\hat{y} = 21.82 + 0.18 x$ | 0.99  | 0.18 |
| Fo             | $\hat{y} = 22.04 + 0.05 x$ | 0.99  | 0.05 |
| Ve             | $\hat{y} = \bar{y} = 23.6$ |       |      |

28  
29

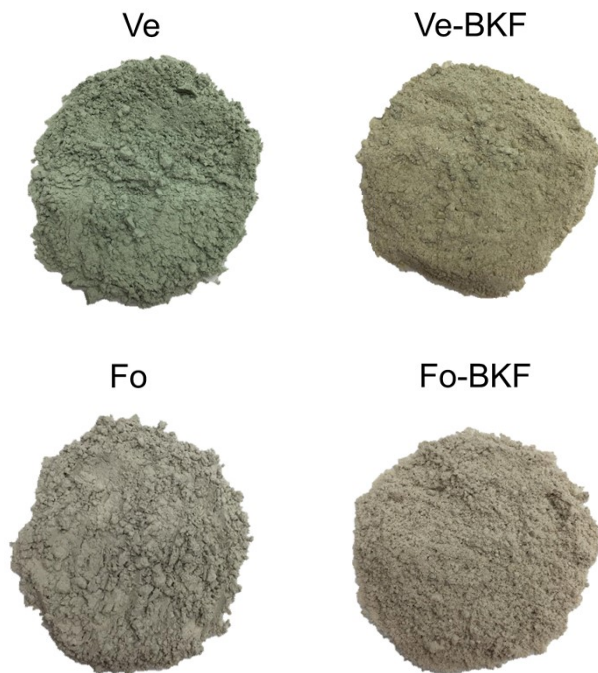

**Fig. A.2.** Macroscopic appearance of verdete (Ve) and phonolite (Fo) rocks before and after acidulation (BKF) with biogenic acid. BKF = biogenic K-fertilizer.

30

31

32 ***Parameters of analytical techniques used***

33         The TXRF analyses were performed in a Shimadzu EDX-720; and the XRD analyses in  
34 a Shimadzu XRD-6000 diffractometer, using a graphite crystal monochromator to select  $\text{CoK}\alpha$   
35 radiation ( $\lambda = 1.7889 \text{ \AA}$ ) at a rate of  $1.2^\circ 2\theta \text{ min}^{-1}$  and a  $2\theta$  range between  $5^\circ$  to  $80^\circ$ . Powder  
36 mounts were prepared by packing ground ( $< 75 \mu\text{m}$ ) samples into Al holders. The FTIR-ATR  
37 spectra were recorded with a Perkin Elmer, model Spectrum 1000, modulo ATR, in the range  
38 from  $400$  to  $4000 \text{ cm}^{-1}$ , at  $4 \text{ cm}^{-1}$  resolution and 32 scans. Raman spectra were obtained using a  
39 Raman Renishaw spectrometer. The samples were measured with  $785 \text{ nm}$  laser line, 10  
40 accumulations, exposure time of  $5 \text{ s}$  and  $0.005\%$  of power. For SEM and EDS analyses, a JEOL  
41 model JSM-6010-LA microscope integrated with an EDS probe operating at  $6 \text{ kV}$  was used to  
42 obtain secondary electron images of the samples, with magnification levels at  $500\times$ . An EDS  
43 operating at  $10 \text{ kV}$  was used to obtain the elementary chemical composition of Ve and Fo rocks.
